# Mechanical Pain Hypersensitivity after Incisional Surgery Is Enhanced in Rats Subjected to Neonatal Peripheral Inflammation

## Effects of N-Methyl-D-aspartate Receptor Antagonists

Ya-Chun Chu, M.D., Ph.D.,\* Kwok-Hon Chan, M.D.,† Mei-Yung Tsou, M.D., Ph.D.,† Su-Man Lin, M.D.,\* Ying-Chou Hsieh, M.D.,‡ Yuan-Xiang Tao, M.D., Ph.D.†

**Background:** Neonatal pain and inflammation may lead to a long-term effect on nociceptive processing in adults. The current study examined the characteristics of postoperative incisional pain behaviors in adult rats that were subjected to neonatal peripheral inflammation.

**Methods:** Rat pups received a subcutaneous injection of saline or carrageenan into the plantar surface of the left hind paw at postnatal day 1. Naive pups were used as the control. Paw withdrawal thresholds to punctuate mechanical stimuli were examined at postnatal days 35, 42, and 49. After rats received a plantar incision on the left or right hind paw at postnatal day 50, paw withdrawal thresholds were measured at 4 h, 1 day, 2 days, 3 days, 5 days, and 7 days after incision. In addition, spinal cord Fos expression was detected at 2 h after incision. Finally, the effects of intrathecal N-methyl-D-aspartate receptor antagonists DL-2-amino-5-phosphonovaleric acid and dizocilpine and the nitric oxide synthase inhibitor L-N<sup>G</sup>-nitro-arginine methyl ester on incisional pain were examined at 4 h after incision.

**Results:** Although the rats subjected to neonatal peripheral carrageenan injection developed mechanical hypoalgesia in bilateral hind paws at baseline, they displayed increased spinal cord Fos expression at 2 h and exaggerated mechanical pain hypersensitivity at 4 h (but not at other time points) after plantar incision. Intrathecal DL-2-amino-5-phosphonovaleric acid, dizocilpine, and L-N<sup>G</sup>-nitro-arginine methyl ester significantly attenuated incision-induced mechanical pain hypersensitivity at 4 h after incision in the neonatally carrageenan-treated rats, but not in the naive or neonatally saline-treated rats.

**Conclusions:** The authors' results suggest that early inflammatory insults during the neonatal period could produce excessive incision-associated mechanical pain hypersensitivity in adult rats. Spinal cord N-methyl-D-aspartate receptors and downstream nitric oxide signaling might contribute to this abnormal pain hypersensitivity, although the mechanisms underlying the long-term effect of neonatal inflammation are still unclear.

CURRENT medical procedures in neonatal intensive care units have increased the survival of premature and other

high-risk neonates. However, these procedures are often invasive and traumatic. They not only cause considerable pain during their application but also are followed by local inflammation that lasts for several hours or even days.<sup>1</sup> Preclinical studies indicate that neonatal inflammatory insults might produce long-term effects on pain responsivity.<sup>2,3</sup> For example, adult rats subjected to a single subcutaneous injection of carrageenan into the plantar surface of a hind paw during the neonatal period (from postnatal days 0 to 5) display bilateral increase in nociceptive threshold (hypoalgesia) at baseline and ipsilateral enhanced increase in nocifensive responses (exaggerated hyperalgesia) to complete Freund adjuvant-induced inflammation.<sup>4–6</sup> Further analysis by DNA microarray and real-time reverse-transcription polymerase chain reaction demonstrated that neonatal local noxious insult altered the expression of multiple genes in the spinal dorsal horn of adult rats.<sup>7</sup> For example, re-inflammation of the left hind paw in adult rats induced significant up-regulation in expression of the genes encoding for N-methyl-D-aspartate (NMDA) receptor subunits in the ipsilateral dorsal horn in the neonatally carrageenan-treated rats, as compared with that in similarly inflamed animals.<sup>7</sup> Changes in the expression of these genes in the spinal cord are proposed to be involved in the central mechanism that underlies the enhanced pain hypersensitivity produced by an inflammatory insult in the neonatal period, but no direct pharmacologic evidence supports this proposal.

Incisional pain is a common syndrome in many patients postoperatively. Optimizing postoperative pain treatment increases patient comfort, reduces complications, and improves postoperative outcome.<sup>8</sup> Postoperative pain management strategies are mainly based on studies performed in animal models of inflammatory pain.<sup>9,10</sup> However, recent evidence indicates that the neurobiology of postoperative incisional pain may be different from inflammatory and neuropathic pain.<sup>11</sup> It is unknown whether early, local, noxious insults during the neonatal period affect postoperative incisional pain in adults.

In the current study, we characterized mechanical pain hypersensitivity induced by incision injury in adult rats that were subjected to a subcutaneous injection of carrageenan into a hind paw at postnatal day 1. We also examined whether spinal NMDA receptors and down-

\* Assistant Professor, † Associate Professor, ‡ Staff Anesthesiologist.

Received from the Department of Anesthesiology, Taipei Veterans General Hospital and National Yang-Ming University, School of Medicine, Taipei, Taiwan, Republic of China, and the Department of Anesthesiology and Critical Care Medicine, Johns Hopkins University School of Medicine, Baltimore, Maryland. Submitted for publication December 5, 2006. Accepted for publication February 13, 2007. Supported by grant No. NSC 95-2314-B-075-093 from the National Science Council of Taiwan, Taipei, Republic of China (to Y.-C.C.), and the Blaustein Pain Research Fund and Department of Anesthesiology and Critical Care Medicine, Johns Hopkins University School of Medicine, Baltimore, Maryland (to Y.-X.T.).

Address correspondence to Dr. Tao: Department of Anesthesiology and Critical Care Medicine, Johns Hopkins University School of Medicine, 355 Ross, 720 Rutland Avenue, Baltimore, Maryland 21205. ytou@jhmi.edu. Individual article reprints may be purchased through the Journal Web site, www.anesthesiology.org.

stream nitric oxide signaling contributed to the excessive incision-associated mechanical pain hypersensitivity in these rats.

## Materials and Methods

### *Animals*

Rats used in this study were born from time-pregnant Sprague-Dawley dams purchased from Yang Ming University Animal Facilities (Taipei, Taiwan, Republic of China). The animals arrived at the Taipei Veterans General Hospital (Taipei, Taiwan, Republic of China) on the 16th day of pregnancy and were allowed to deliver at term. They were housed individually in cages with food and water available *ad libitum* and kept on a standard 12 h–12 h light–dark cycle. The sexing of the pups was identified at birth by evaluation of the anogenital distance. Males were returned to the mother, and females were killed. After weaning at postnatal day 21, the male pups were housed in groups of three until the end of the experiments, except that rats with intrathecal catheter placement were housed individually. The animals were used in accordance with protocols approved by the Animal Care and Use Committees at the Taipei Veterans General Hospital and were consistent with the ethical guidelines of the National Institutes of Health and the International Association for the Study of Pain. All efforts were made to minimize animal suffering and to reduce the number of animals used.

### *Experimental Drugs*

Isoflurane was purchased from Baxter Caribe Inc. (Guayama, Puerto Rico). Carrageenan, DL-2-amino-5-phosphonovaleric acid (DL-APV), dizocilpine (MK-801), and L-N<sup>G</sup>-nitro-arginine methylester (L-NAME) were purchased from Sigma Chemical Co. (St. Louis, MO) and dissolved in 0.9% physiologic saline. All solutions were freshly prepared on the day of the experiments. The doses of drugs used were based on the previous studies.<sup>12,13</sup>

### *Carrageenan Injection*

Neonatal pups were divided into three groups: naive, saline treated, and carrageenan treated. In the carrageenan-treated group, the pups received a single injection of 0.25% carrageenan (1  $\mu$ l/g) into the plantar surface of the left hind paw at postnatal day 1. In the saline-treated group, the pups received an equal volume of saline injection. Behavioral testing as described below was performed on postnatal days 35, 42, and 49.

### *Behavioral Testing*

Mechanical pain hypersensitivity was assessed by studying the 50% paw withdrawal threshold to a tactile stimulus with calibrated von Frey monofilaments. Paw

withdrawal thresholds were measured using the up-down method, as previously described.<sup>14</sup> Briefly, rats were placed in a transparent plastic box with a metal wire mesh floor and were allowed to acclimate to the test chamber for 1 h. Von Frey filaments with approximately equal logarithmic incremental (0.22) von Frey values (1.57, 2.45, 4.21, 7.15, 12.64, 21.17, 37.04, 61.45, 101.92, and 159.74 in mN, starting from 21.17 mN) were used to determine the threshold stiffness required for 50% paw withdrawal. Each von Frey filament was presented perpendicularly, pointing distally toward the incision 1–2 mm into the foot pad and held in this position for approximately 3–5 s, with enough force to cause a slight bend in the filament. The next filament was applied approximately 5–10 s later. Positive responses included an abrupt withdrawal of the hind paw from the stimulus, or flinching behavior immediately after removal of the stimulus. The 50% threshold value was calculated using the formula of Dixon.<sup>15</sup> All behavioral tests were conducted by a single experimenter and in a blinded manner.

### *Plantar Incision*

At postnatal day 50, rats were anesthetized with 2–3% isoflurane delivered *via* a nose cone. According to the previous studies,<sup>16,17</sup> the plantar aspect of the hind paw was prepared, and a 1-cm longitudinal incision was made through the skin, fascia, and muscle of the plantar aspect of the hind paw. The skin was apposed with two 5-0 nylon sutures, and the wound site was covered with antibiotic ointment. The rats were allowed 1 h for complete recovery from inhaled anesthesia. Behavioral testing as described above was performed at 4 h, 1 day, 2 days, 3 days, 5 days, and 7 days after incision. Sutures were removed at the end of postoperative day 2.

### *Intrathecal Catheter Placement and Drug Injection*

Animals under isoflurane anesthesia were implanted with an intrathecal catheter. A polyethylene (PE-10) tube was inserted into the subarachnoid space at the rostral level of the spinal cord lumbar enlargement segments through an incision at the atlanto-occipital membrane, according to the previously described method.<sup>13,18,19</sup> The animals were allowed to recover for 5–10 days before incisional surgery was performed. Rats that showed any neurologic deficits postoperatively were discarded from the study. PE-10 catheter position from each animal was confirmed after behavioral testing.

After behavioral testing at 4 h after incision, vehicle (saline, 10  $\mu$ l), MK-801 (a noncompetitive NMDA receptor antagonist, 40 nmol/10  $\mu$ l), DL-APV (a competitive NMDA receptor antagonist, 10 and 30 nmol/10  $\mu$ l), or L-NAME (a nonselective nitric oxide inhibitor; 200 nmol/10  $\mu$ l) was administered intrathecally. Behavioral testing as described above was conducted at 20, 40, 60, 80, 100, 120, 180, and 240 min after injection.

### Locomotor Function Testing

To examine whether the drugs used in behavioral testing affected the locomotor function, the placing reflex was tested as described previously.<sup>17</sup> In brief, the animals received intrathecal injection with vehicle (saline), MK-801 (40 nmol/10  $\mu$ l), DL-APV (10 nmol and 30 nmol/10  $\mu$ l), or L-NAME (200 nmol/10  $\mu$ l). The placing reflex evaluation was performed at 20, 40, 60, 80, 100, 120, 180, and 240 min after injection. Each rat was placed on a table, and the dorsum of either hind paw was drawn across the edge of the table. The score for placing reflex was based on the latency of each reflex exhibited in three trials (2 = normal [ $< 1$  s]; 1 = delay [1–2 s]; 0 = defect [ $> 2$  s]). Rat general behaviors, including spontaneous activity, were also observed.

### Fos Immunocytochemistry

The rats were deeply anesthetized with isoflurane and perfused with 4% paraformaldehyde in phosphate buffer (0.1 M, pH 7.4) at 2 h after plantar incision. The fourth and fifth lumbar segments were harvested, postfixed in the same fixative solution for 4–8 h, cryoprotected by immersing in 30% sucrose overnight at 4°C, and frozen-sectioned at 25  $\mu$ m. Sections were processed for Fos immunocytochemistry *via* the conventional avidin-biotin complex method based on previous studies.<sup>20,21</sup> Briefly, sections were incubated in polyclonal rabbit anti-Fos antibody (1:1,000; Santa Cruz Biotechnology, Santa Cruz, CA) diluted in 0.01 M phosphate-buffered saline (pH 7.4) containing 3% normal goat serum and 0.3% Triton X-100 for 48 h at 4°C. The sections were then incubated in biotinylated goat anti-rabbit immunoglobulin G (1:200; Vector Laboratories, Burlingame, CA) for 1 h at room temperature followed by avidin-biotin-peroxidase complex (1:100; Vector Laboratories) for 1 h at 37°C. The immune reaction product was visualized by catalysis of 3,3-diaminobenzidine by horseradish peroxidase in the presence of 0.01% H<sub>2</sub>O<sub>2</sub>.

Ten sections were randomly taken from the fourth and fifth lumbar segments of the spinal cord of each rat and examined with a microscope linked to a computer-assisted image-processing system through a video camera. To quantify the anatomical results, the spinal dorsal horn was divided into three regions: the superficial laminae (laminae I and II), the nucleus proprius (laminae III and IV), and the neck of the dorsal horn (laminae V and IX). The number of Fos immunoreactive neurons was independently counted by two experimenters, the results of which were consistent within 10%.

### Statistical Analysis

Data were presented as median  $\pm$  interquartile range or mean  $\pm$  SEM, when appropriate. Mechanical withdrawal thresholds were compared using nonparametric analyses. The Friedman test for within-group and the Kruskal-Wallis and Mann-Whitney rank sum tests for

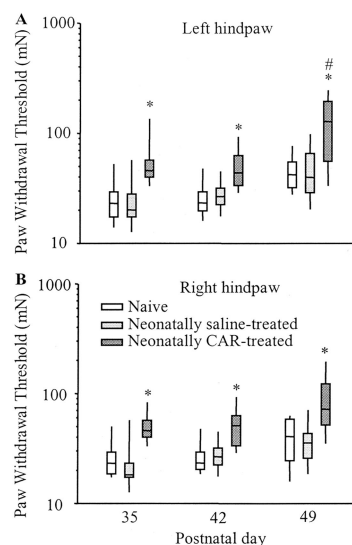

**Fig. 1.** Box plot representing paw withdrawal thresholds in response to mechanical stimuli on the left (A) and right (B) hind paws in naive ( $n = 12$ ), neonatally saline-treated ( $n = 12$ ), and neonatally carrageenan (CAR)-treated ( $n = 12$ ) groups at postnatal days 35, 42, and 49. The box and whisker plots are expressed as medians (horizontal lines) with first and third quartiles (boxes), and 10th and 90th percentiles (vertical lines). \*  $P < 0.05$  versus the corresponding naive and the neonatally saline-treated groups at each time point. #  $P < 0.05$  versus the neonatally CAR-treated groups at postnatal days 35 and 42.

between-group comparisons were used. Multiple comparisons after Friedman and the Kruskal-Wallis tests were performed using a two-tailed Dunn tests. Analgesic indexes for the effects of drugs were represented by the area under the curve, calculated for each rat by the trapezoidal method.<sup>22</sup> Indexes were compared by the Kruskal-Wallis test and Dunn *post hoc* test. The number of spinal Fos-like immunoreactive neurons was compared by one-way analysis of variance and Student-Newman-Keuls *post hoc* comparisons. Significance was set at  $P < 0.05$ . All statistical analyses were performed using the SigmaStat (Systat, Port Richmond, CA) statistical software package.

## Results

### Development of Basal Hypoalgesia in the Neonatally Carrageenan-treated Rats

Consistent with previous studies,<sup>4,5</sup> adult rats that received carrageenan injection into the left hind paw at postnatal day 1 exhibited basal mechanical hypoalgesia on both hind paws when paw withdrawal thresholds in response to punctuate mechanical stimuli were measured at postnatal days 35, 42, and 49. Basal median withdrawal thresholds in the neonatally carrageenan-treated group ( $n = 12$ ) were significantly increased, compared with those recorded for the corresponding hind paw in naive ( $n = 12$ ) or the neonatally saline-treated ( $n = 12$ ) rats at these three time points (Kruskal-Wallis test,  $df = 2$ ,  $P < 0.05$ ; figs. 1A and B). The highest



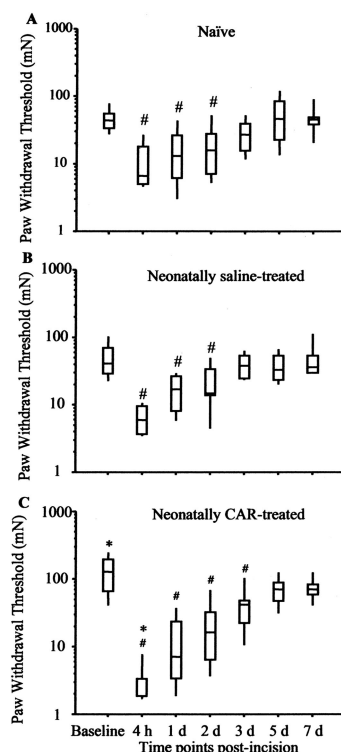

**Fig. 2.** Paw withdrawal thresholds in response to mechanical stimuli on the left hind paw at postnatal day 49 (baseline) and at 4 h, 1 day, 2 days, 5 days, and 7 days after plantar incision of the left hind paw in naive ( $n = 12$ ) (A), neonatally saline-treated ( $n = 12$ ) (B), and neonatally carrageenan (CAR)-treated ( $n = 12$ ) (C) groups. #  $P < 0.05$  versus the corresponding baseline in each group. \*  $P < 0.05$  versus the corresponding time points in the naive and saline-treated groups.

increase in basal median mechanical withdrawal threshold was observed at postnatal day 49 (fig. 1). On the left hind paw, median withdrawal threshold was 41.9 mN for the naive group, 39.7 mN for the neonatally saline-treated group, and 126.8 mN for the neonatally carrageenan-treated group on postnatal day 49 (Kruskal-Wallis test,  $df = 2$ ,  $P < 0.001$ ; fig. 1A). On the right hind paw, median withdrawal threshold was 40.5 mN for the naive group, 35.4 mN for the neonatally saline-treated group, and 71.8 mN for the neonatally carrageenan-treated group on postnatal day 49 (Kruskal-Wallis test,  $df = 2$ ,  $P < 0.01$ ; fig. 1B).

#### *Enhanced Plantar Incision-induced Mechanical Pain Hypersensitivity in the Neonatally Carrageenan-treated Rats*

After plantar incision on the left hind paw, mechanical pain hypersensitivity (*i.e.*, the marked decreases in paw withdrawal thresholds in response to punctuate mechanical stimuli) was developed on the ipsilateral side in the naive (Friedman test,  $\chi^2_6 = 37.2$ ,  $n = 12$ ,  $P < 0.001$ ; fig. 2A), neonatally saline-treated (Friedman test,  $\chi^2_6 = 34.9$ ,  $n = 12$ ,  $P < 0.001$ ; fig. 2B), and neonatally carrageenan-treated (Friedman test,  $\chi^2_6 = 54.8$ ,  $n = 12$ ,  $P < 0.001$ ; fig. 2C) groups. It reached a peak at 4 h, lasted for

2 days after incision in the naive and neonatally saline-treated rats, and persisted for 3 days after incision in the neonatally carrageenan-treated group. More importantly, the median mechanical withdrawal threshold (1.86 mN) in the neonatally carrageenan-treated group was significantly lower compared with that in the naive group (6.57 mN) or in the neonatally saline-treated group (5.93 mN) at 4 h (Kruskal-Wallis test,  $df = 2$ ,  $P < 0.001$ ), but not at days 1 and 2 after incision (Kruskal-Wallis test,  $df = 2$ ,  $P > 0.05$ ; fig. 3A). In contrast, after plantar incision on the left hind paw, the median mechanical withdrawal threshold on the right hind paw in the neonatally carrageenan-treated group was not significantly different from that in either the naive or neonatally saline-treated group (Kruskal-Wallis test,  $df = 2$ ,  $P > 0.05$ ; fig. 3B) or from the corresponding baseline (Kruskal-Wallis test,  $df = 2$ ,  $P > 0.05$ ; fig. 3B).

To test whether incisional surgery on the neonatally intact hind paw affected mechanical withdrawal thresholds, we performed plantar incision on the right hind paw of three animal groups. Median mechanical withdrawal threshold on the right hind paw in the neonatally carrageenan-treated group ( $n = 12$ ) was similar to that in naive group ( $n = 12$ ) (data not shown) and to that in the neonatally saline-treated group ( $n = 12$ ) (Mann-Whitney test,  $P > 0.05$ ; fig. 3C), although mechanical withdrawal thresholds on the right side in all three groups were significantly decreased after plantar incision (figs. 1B and 3C). As expected, after plantar incision on the right hind paw, the median mechanical withdrawal threshold on the left hind paw in the neonatally carrageenan-treated group was not significantly different from that in either the naive (data not shown) or the neonatally saline-treated group (Mann-Whitney test,  $P > 0.05$ ; fig. 3D). Interestingly, the median mechanical withdrawal threshold on the left hind paw in the neonatally carrageenan-treated group at 4 h (Mann-Whitney test,  $P < 0.05$ ; fig. 3D), but not at days 1 and 2 (Mann-Whitney test,  $P > 0.05$ ; data not shown), after an incision of the right hind paw was markedly reduced compared with the corresponding baseline.

#### *Increased Plantar Incision-induced Spinal Dorsal Horn Fos Expression in the Neonatally Carrageenan-treated Rats*

Fos as the protein product of *c-fos*, a proto-oncogene, has been widely used as a marker for functional activity of the neurons, especially in the study of the response of the spinal dorsal horn neurons to noxious stimulation.<sup>23</sup> Its expression could be specifically induced in the superficial and deep dorsal horn and significantly attenuated by NMDA receptor antagonists and nitric oxide synthase inhibitors.<sup>20,21,24-27</sup> To further examine whether neonatal carrageenan injection affected incision-induced functional activity in spinal dorsal horn neurons of the adult rats, we measured Fos expression in the dorsal horn of the three groups after plantar incision. Consistent with previous

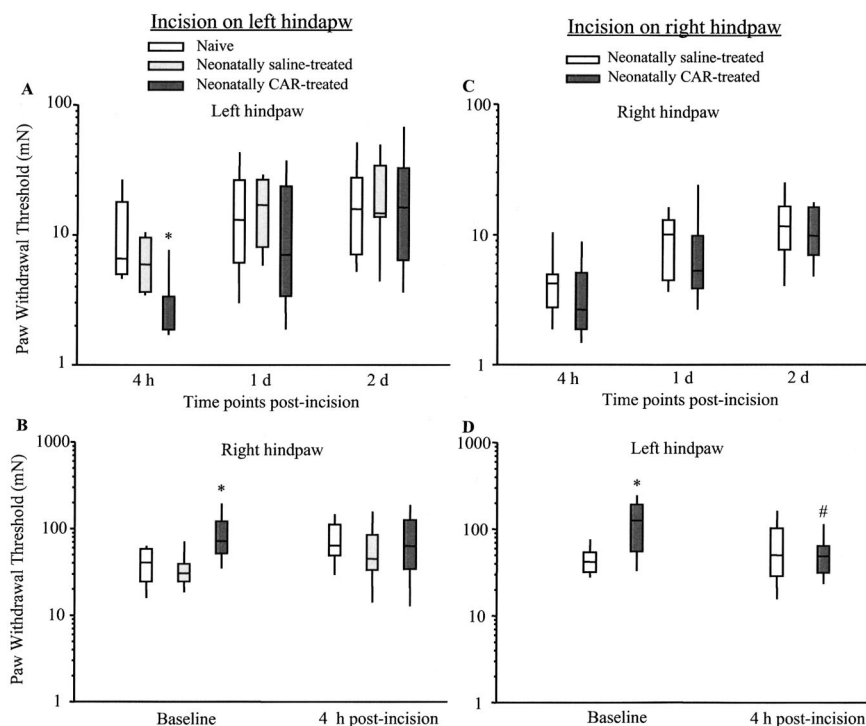

**Fig. 3.** Effect of incision on the left or right hind paw on mechanical withdrawal thresholds in naive, neonatally saline-treated, and neonatally carrageenan (CAR)-treated groups. (A and B) Paw withdrawal thresholds in response to mechanical stimuli on the left hind paw at 4 h, 1 day, and 2 days after incision of the left hind paw (A), and on the right hind paw before incision (baseline) and at 4 h after incision of the left hind paw (B) in naive ( $n = 12$ ), neonatally saline-treated ( $n = 12$ ), and neonatally CAR-treated ( $n = 12$ ) groups. (C and D) Paw withdrawal thresholds in response to mechanical stimuli on the right hind paw at 4 h, 1 day, and 2 days after incision of the right hind paw (C), and on the left hind paw before incision (baseline) and at 4 h after incision of the right hind paw (D) in neonatally saline-treated ( $n = 12$ ) and neonatally CAR-treated ( $n = 12$ ) groups. \*  $P < 0.05$  versus either the naive or saline-treated groups at the same time point. #  $P < 0.05$  versus the neonatally CAR-treated group at baseline.

studies in the formalin model,<sup>20,21</sup> plantar incision induced Fos expression in the ipsilateral dorsal horn of spinal cord in the naive ( $n = 5$ ), neonatally saline-treated ( $n = 5$ ), and neonatally carrageenan-treated ( $n = 5$ ) groups (figs. 4A and B). Most of the Fos-like immunoreactive neurons were distributed in the medial part of the superficial laminae (laminae I and II), and a few were observed in laminae III and VI. As expected, without plantar incision, little or no Fos expression was detected in the dorsal horns of the three groups (fig. 4C). Our pilot work showed that incision-

induced spinal cord Fos expression was time dependent and reached a peak at approximately 2 h after incision. In the current study, we quantified Fos expression at 2 h and found that the number of incision-induced Fos-like immunoreactive neurons in laminae I and II and laminae III and IV in the neonatally carrageenan-treated rats was significantly increased, compared with the naive or the neonatally saline-treated rats (figs. 4A, B, and D). In laminae I and II, the average number of Fos-like immunoreactive neurons per section was  $41 \pm 2.89$  for the naive group,  $37.3 \pm 3.84$

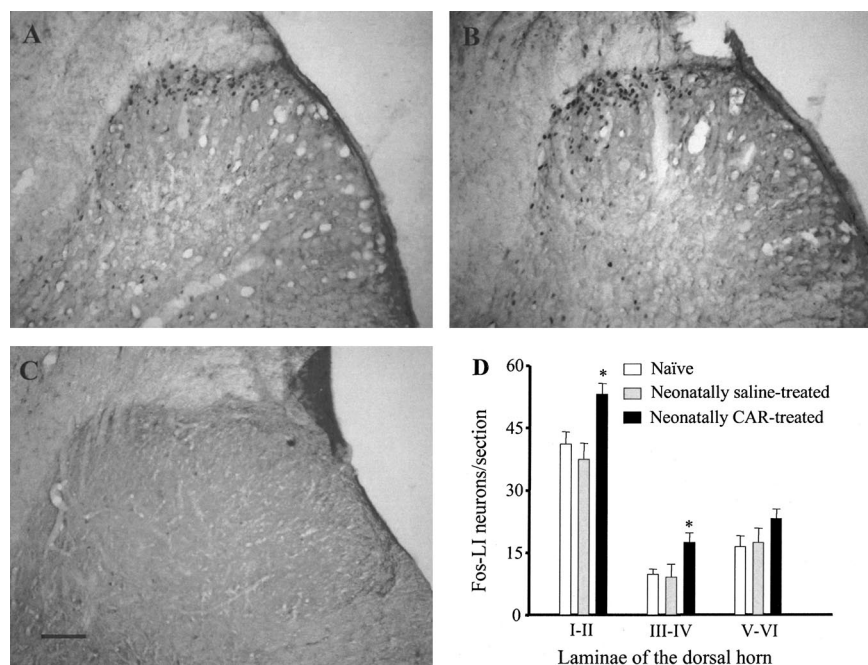

**Fig. 4.** Representative photomicrographs illustrating the distribution of Fos-like immunoreactive (LI) neurons in the ipsilateral dorsal horn of the fifth lumbar spinal segment at 2 h after plantar incision of the left hind paw in neonatally saline-treated (A) and carrageenan (CAR)-treated (B) groups. Without plantar incision, little or no Fos expression was observed in the dorsal horn in the naive (data not shown), the neonatally saline-treated (data not shown), or the neonatally CAR-treated (C) groups. (D) Quantification of Fos-like immunoreactive neurons in laminae I and II, III and IV, and V and VI. Ten random sections were taken from the fourth and fifth lumbar segments in each rat.  $n = 5$ /group. \*  $P < 0.05$  versus the naive or the neonatally saline-treated group. Scale bar: 100  $\mu\text{m}$ .

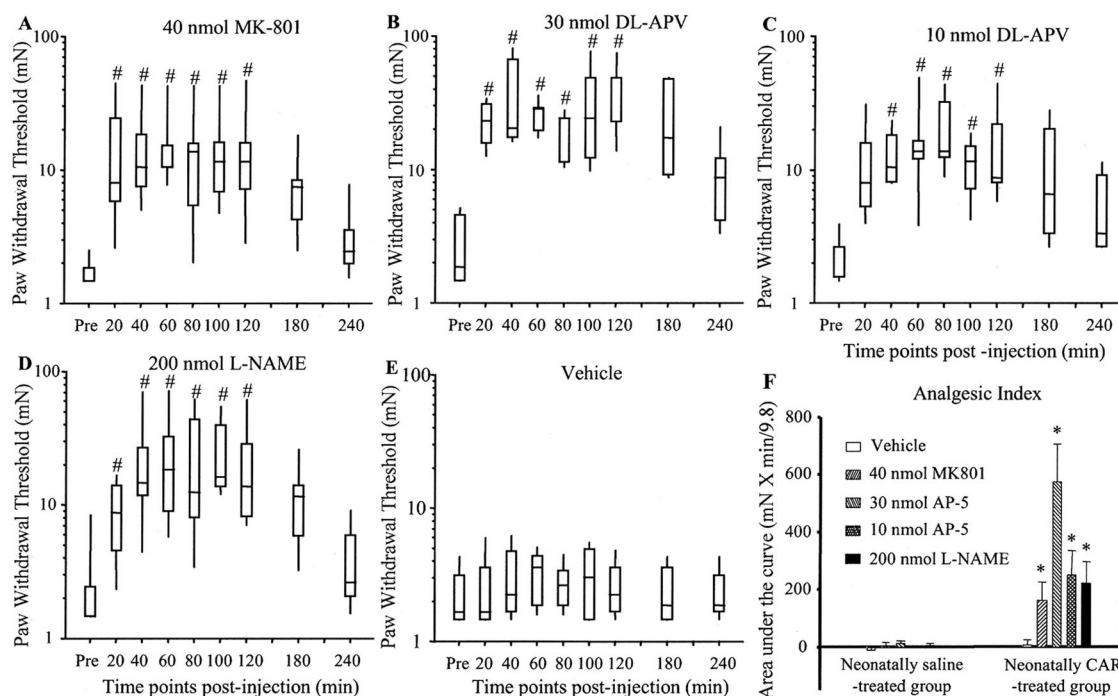

**Fig. 5.** Effect of intrathecal 40 nmol dizocilpine (MK-801) ( $n = 7$ ; A), 30 nmol DL-2-amino-5-phosphonovaleric acid (DL-APV) ( $n = 7$ ; B), 10 nmol DL-APV ( $n = 7$ ; C), 200 nmol L-<sup>N</sup>-nitro-arginine methylester (L-NAME) ( $n = 7$ ; D), or vehicle (saline) ( $n = 7$ ; E) on incision-induced mechanical pain hypersensitivity at 4 h after incision in neonatally carrageenan (CAR)-treated group. Paw withdrawal thresholds were measured before drug injection (Pre) and at 20, 40, 60, 80, 100, 120, 180, and 240 min after drug injection. #  $P < 0.05$  versus before drug injection (Pre). (F) Analgesic indices of 40 nmol MK-801 ( $n = 7$ ), 10 nmol DL-APV ( $n = 7$ ), 30 nmol DL-APV ( $n = 7$ ), 200 nmol L-NAME ( $n = 7$ ), and vehicle ( $n = 7$ ) in the neonatally saline-treated and neonatally CAR-treated groups. \*  $P < 0.05$  versus vehicle.

for the neonatally saline-treated group, and  $53 \pm 2.52$  for the neonatally carrageenan-treated group ( $F_{2,12} = 4.89$ ,  $P < 0.05$ ). In laminae III and IV, the average number of Fos-like immunoreactive neurons per section was  $9.67 \pm 1.2$  for naive group,  $9.0 \pm 3.1$  for the neonatally saline-treated group, and  $17.33 \pm 2.89$  for the neonatally carrageenan-treated group ( $F_{2,12} = 9.06$ ,  $P < 0.05$ ). No difference in number of Fos-like immunoreactive neurons in laminae V and VI was observed among three groups ( $F_{2,12} = 1.17$ ,  $P > 0.05$ ; fig. 4D).

#### Effects of Intrathecal MK-801, DL-APV, and L-NAME on Plantar Incision-induced Mechanical Pain Hypersensitivity

Consistent with previous studies,<sup>12,17</sup> intrathecal administration of 40 nmol MK-801, 30 nmol DL-APV, or 200 nmol L-NAME at 4 h after incision did not produce significant effects on incision-induced decreases in median mechanical withdrawal thresholds in the naive (data not shown) or the neonatally saline-treated (Friedman test,  $\chi^2_8 = 6.945$  for MK-801,  $\chi^2_8 = 8.75$  for DL-APV,  $\chi^2_8 = 14.36$  for L-NAME,  $\chi^2_8 = 10.08$  for vehicle,  $P > 0.05$  for all,  $n = 7$ /group; data not shown) groups. However, incision-induced decrease of median mechanical withdrawal threshold in the neonatally carrageenan-treated group was significantly reversed by intrathecal 40 nmol MK-801 (Friedman test,  $\chi^2_8 = 32.4$ ,  $n = 7$ ,  $P < 0.001$ ; fig. 5A), 30 nmol DL-APV (Friedman test,  $\chi^2_8$

$= 34.1$ ,  $n = 7$ ,  $P < 0.001$ ; fig. 5B), 10 nmol DL-APV (Friedman test,  $\chi^2_8 = 27.3$ ,  $n = 7$ ,  $P < 0.001$ ; fig. 5C), and 200 nmol L-NAME (Friedman test,  $\chi^2_8 = 36.1$ ,  $n = 7$ ,  $P < 0.001$ ; fig. 5D), but not by vehicle (saline) (Friedman test,  $\chi^2_8 = 10.1$ ,  $n = 7$ ,  $P > 0.05$ ; fig. 5E), at 4 h, but not at days 1, 2, and 3 (data not shown), after incision. The effects of the antagonists or the inhibitor appeared at 20–40 min and lasted at least 120 min after intrathecal injection (figs. 5A–E). The analgesic indices were significantly increased after intrathecal injection of the antagonists or the inhibitor, compared with those after intrathecal injection of vehicle in the neonatally carrageenan-treated rats (Kruskal-Wallis test,  $df = 4$ ,  $P < 0.001$ ; fig. 5F).

#### Effect of Intrathecal MK-801, DL-APV, and L-NAME on Placing Reflex

Finally, we tested whether the antagonists and the inhibitor at the doses used in the behavioral testing affected the locomotor function. As shown in table 1, except for 30 nmol DL-APV ( $n = 7$ ), which significantly reduced the placing reflex from 20 to 60 min after injection (Kruskal-Wallis test,  $df = 8$ ,  $P < 0.001$ ), 10 nmol DL-APV ( $n = 7$ ), 40 nmol MK-801 ( $n = 7$ ), and 200 nmol L-NAME ( $n = 7$ ) as well as vehicle ( $n = 7$ ) did not markedly change the placing reflex during the behavioral observation period. In addition, no significant differences in general behaviors, including spontaneous



**Table 1. Effects of NMDA Receptor Antagonist and Nitric Oxide Synthase Inhibitor on Placing Reflex**

| Group            | Paw Tested | Minutes after Intrathecal Injection |    |    |    |    |     |     |     |
|------------------|------------|-------------------------------------|----|----|----|----|-----|-----|-----|
|                  |            | Pre                                 | 20 | 40 | 60 | 80 | 100 | 120 | 180 |
| Saline           | Left       | 6                                   | 6  | 6  | 6  | 6  | 6   | 6   | 6   |
|                  | Right      | 6                                   | 6  | 6  | 6  | 6  | 6   | 6   | 6   |
| MK-801, 40 nmol  | Left       | 6                                   | 5  | 5  | 6  | 6  | 6   | 6   | 6   |
|                  | Right      | 6                                   | 5  | 5  | 6  | 6  | 6   | 6   | 6   |
| DL-APV, 30 nmol  | Left       | 6                                   | 3* | 3* | 3* | 4  | 5   | 5   | 6   |
|                  | Right      | 6                                   | 3* | 3* | 4* | 4  | 5   | 5   | 6   |
| DL-APV, 10 nmol  | Left       | 6                                   | 5  | 5  | 6  | 6  | 6   | 6   | 6   |
|                  | Right      | 6                                   | 5  | 6  | 6  | 6  | 6   | 6   | 6   |
| L-NAME, 200 nmol | Left       | 6                                   | 6  | 5  | 6  | 6  | 6   | 6   | 6   |
|                  | Right      | 6                                   | 6  | 6  | 6  | 6  | 6   | 6   | 6   |

n = 7, three trials.

\*  $P < 0.05$  vs. pretreatment.

DL-APV = DL-2-amino-5-phosphonovaleic acid; L-NAME = L- $N^G$ -nitro-arginine methylester; NMDA = N-methyl-D-aspartate.

activity, were observed between the drug-treated and vehicle groups.

## Discussion

The current study demonstrates that intraplantar injection of carrageenan into the left hind paw of Sprague-Dawley male rats on postnatal day 1 produces enhanced plantar incision-induced mechanical pain hypersensitivity on the ipsilateral hind paw of adult rats at 4 h after incision. This enhancement was significantly reversed by intrathecal administration of DL-APV, MK-801, and L-NAME. Our findings indicate that neonatal noxious insult could produce a long-term effect on postoperative incisional pain in adults. Spinal cord NMDA receptors and downstream nitric oxide signaling might be involved in the central mechanism that underlies this long-term effect.

Emerging evidence indicates that neonatal noxious insults produce the long-term changes in pain responsivity in adults.<sup>2-5</sup> These changes include basal hypoalgesia and excessive reinflammation-associated hyperalgesia in the adult rats subjected to plantar injection of carrageenan at postnatal days 0-5 (but not at postnatal day 8 or more). Consistent with previous studies,<sup>5,28,29</sup> the current study showed that a single injection of carrageenan into the plantar surface of the left hind paw at postnatal day 1 resulted in significant increases in basal paw withdrawal thresholds in response to mechanical stimuli on both hind paws. We also found excessive incision-associated mechanical pain hypersensitivity on the left hind paw only on the day of surgery (at 4 h) but not on postoperative day 1 or 2 in the neonatally carrageenan-treated group, compared with that in the naive or the neonatally saline-treated group. Moreover, our study showed that plantar incision produced a greater

increase in Fos expression, a marker for functional activity of neurons,<sup>20,21</sup> in the ipsilateral spinal dorsal horn of the neonatally carrageenan-treated rats at 2 h after incision, compared with that in the naive or the neonatally saline-treated rats. These findings further support the notion that neonatal local noxious insult could lead to long-term effects on central responses to painful stimuli in adults.

However, the underlying mechanisms by which neonatal pain produces long-term effects on nociceptive systems in adults are still unclear. It has been proposed that the neonatal local nociceptive insult might induce both nociception-enhancing changes and a compensatory boosting of the relevant inhibitory mechanisms.<sup>2,30-32</sup> Under basal conditions, the balance between these two competing mechanisms in the neonatally inflamed animals may favor descending inhibition that masks segmental nociceptive hypersensitivity and results in widespread hypoalgesia. The latter is supported by the observation that long-term hypoalgesia was detected not only in the neonatally carrageenan-injected left hind paw, but also in the intact right hind paw and forepaw.<sup>4,5</sup> Plantar incision in the current study and reinflammation in the previous studies<sup>4,5</sup> at the site of the neonatal inflammatory insult may strengthen the pronociceptive mechanisms, resulting in enhanced pain hypersensitivity on the ipsilateral hind paw and in undetected hypoalgesia on the contralateral hind paw. It is clearly evident that excessive pain hypersensitivity has a local and ipsilateral segmental nature, which is further supported by our observation that the excessive pain hypersensitivity was not reproduced by plantar incision of the right hind paw in the rats with the neonatally inflamed left hind paw. A more recent report revealed significant basal and inflammation-associated aberrations in the expression of multiple genes in the lumbar dorsal horn in the neonatally carrageenan-treated rats.<sup>7</sup> The expression of 12 genes was up-regulated in a bilateral fashion in the dorsal horn at baseline. These genes encode members of several proteins, such as  $\gamma$ -aminobutyric acid synthesis enzymes and receptors, interleukins and their receptors, serotonin, adenosine, neuropeptide Y, cholecystokinin receptors, opioid, and tachykinin peptides.<sup>7</sup> The translational products of the majority of these genes are most likely to enhance inhibitory processing of nociceptive input in the spinal cord. Adult inflammation of the left hind paw induced significant up-regulation in expression of 36 genes in the ipsilateral dorsal horn in the neonatally carrageenan-treated rats, compared with similarly inflamed animals.<sup>7</sup> In particular, eight of the affected genes encode interleukins and their receptors, which are proinflammatory molecules.<sup>32,33</sup> Another eight genes encode glutamate neurotransmission-related proteins, including subunits of NMDA receptors and alpha-amino-3-hydroxy-5-methyl-4-isoxazolepropionic acid receptors, which play mostly pronociceptive

roles in the dorsal horn.<sup>34,35</sup> However, it is still unclear whether the changes in these affected genes are really involved in the molecular mechanisms of long-term alteration in nociception produced by early local noxious insult.

We have noted that the withdrawal mechanical thresholds that were measured in all three groups in our study were lower compared with the previous studies.<sup>12,16,17</sup> The reason for the discrepancy between the previous and current results is unclear but may be related to the different age of the rats that were used in the previous and current studies. Most previous studies used Sprague-Dawley rats with body weight of 300–350 g, which may be aged 2 months or older, whereas we used Sprague-Dawley rats aged younger than 2 months ( $\leq 57$  days; body weight  $< 250$  g). A previous study demonstrated that paw withdraw mechanical thresholds in the younger rats were significantly lower than those in the older rats.<sup>5</sup> In addition, it is possible that the rats from different vendors (especially from different counties) may have distinct behavioral responses to mechanical stimulation, although they are the same species.

The current study demonstrated that activation of spinal cord NMDA receptors and downstream nitric oxide signaling might play a critical role in the central mechanism that underlies excessive incision-associated mechanical pain hypersensitivity in rats subjected to neonatal peripheral inflammation. Intrathecal administration of 40 nmol MK-801, 10 and 30 nmol DL-APV, or 200 nmol L-NAME at 4 h after incision significantly reversed the incision-induced decrease in paw withdrawal threshold in response to mechanical stimuli on the neonatally carrageenan-injected hind paw. Neither the antagonists nor inhibitor at the doses used (except for DL-APV at 30 nmol) produced remarkable effects on locomotor activity, indicating that their effects on excessive incision-associated mechanical pain hypersensitivity in the neonatally inflamed rats may be due to their analgesic action. We also found that intrathecal administration of the antagonists and the inhibitor at the doses used did not affect incision-induced mechanical pain hypersensitivity at 4 h after incision in either the naive group or the neonatally saline-treated groups. This is consistent with previous reports<sup>12,17</sup> that demonstrated that spinal NMDA receptors are not involved in central mechanisms underlying incisional pain in normal rats. How do they produce different effects on incision-induced pain hypersensitivities in the neonatally inflamed group *versus* the naive group or the neonatally saline-injected groups? It is well known that glutamate, the principal excitatory neurotransmitter at the synapses, causes sustained depolarization of dorsal horn neurons, removes the voltage-dependent magnesium block from the NMDA receptor complex, and allows calcium influx. Intracellular calcium increase induces activation of calmodulin-dependent protein kinases, nitric oxide production, and pro-

tein phosphorylation.<sup>34,36,37</sup> It is possible that in the naive and the neonatally saline-treated groups, the extent of incisional injury might not be sufficient to activate spinal NMDA receptors, even if it produces the greatest pain hypersensitivity at 4 h after incision.<sup>12</sup> Conversely, in the neonatally carrageenan-treated group, neonatal local inflammatory insult might up-regulate NMDA receptor subunits in adults, which is likely to increase NMDA receptor ligand sensitivity,<sup>38,39</sup> resulting in much easier activation of spinal NMDA receptors evoked by incisional injury at 4 h after incision. This deduction is strongly supported by the aforementioned fact that neonatal inflammatory insult up-regulated the expression of the genes encoding NMDA receptor subunits in the ipsilateral dorsal horn of adult rats during re-inflammation.<sup>7</sup> Interestingly, our pilot work showed that MK-801, DL-APV, and L-NAME at the doses used did not affect the incision-induced mechanical pain hypersensitivity in the neonatally carrageenan-treated group at day 1 or 2 after incision. At these two time points, plantar incision-induced mechanical pain hypersensitivity in the neonatally carrageenan-treated group was similar to that in the naive and neonatally saline-treated groups, suggesting that the intensity of noxious inputs from the healing wound at days 1 and 2 after incision might not be enough to activate spinal NMDA receptors, even if spinal NMDA receptor subunits and their ligand sensitivity are increased. Therefore, it is likely that spinal NMDA receptors and downstream nitric oxide signaling might specifically contribute to the central mechanism underlying excessive incision-associated pain hyperalgesia in rats subjected to early local noxious insult.

In conclusion, the current study, for the first time, demonstrated that neonatal pain and inflammation could lead to excessive incision-associated mechanical pain hypersensitivity in adult rats. It has been postulated that the rat central nervous system during the first postnatal week developmentally corresponds to that of prematurely born human infants who usually require placement in the postpartum neonatal intensive care unit for invasive procedures associated with pain and local inflammation.<sup>1,40</sup> The current study suggests that these infants might experience abnormal sensitivity to noxious environmental stimuli, such as surgical incision, in later life. This places special emphasis and urgency on prevention and treatment of pain and inflammation in premature infants. Our current work also suggests that NMDA receptors and downstream nitric oxide signaling might be involved in the central mechanism that underlies this abnormal pain sensitivity. Spinal cord NMDA receptors might be a potential target for treatment of abnormal incisional pain in some patients who are born prematurely.

The authors thank the Department of Medical Research and Education, Taipei Veterans General Hospital, Taiwan, Republic of China, for partial facility support.



The authors thank Tzipora Sofare, M.A. (Editor/Project Coordinator, Department of Anesthesiology and Critical Care Medicine, Johns Hopkins University School of Medicine, Baltimore, Maryland), for editorial assistance.

## References

- Anand KJ: Clinical importance of pain and stress in preterm neonates. *Biol Neonate* 1998; 73:1-9
- Lidow MS: Long-term effects of neonatal pain on nociceptive systems. *Pain* 2002; 99:377-83
- Ruda MA, Ling QD, Hohmann AG, Peng YB, Tachibana T: Altered nociceptive neuronal circuits after neonatal peripheral inflammation. *Science* 2000; 289:628-31
- Lidow MS, Song ZM, Ren K: Long-term effects of short-lasting early local inflammatory insult. *Neuroreport* 2001; 12:399-403
- Ren K, Anseloni V, Zou SP, Wade EB, Novikova SI, Ennis M, Traub RJ, Gold MS, Dubner R, Lidow MS: Characterization of basal and re-inflammation-associated long-term alteration in pain responsiveness following short-lasting neonatal local inflammatory insult. *Pain* 2004; 110:588-96
- Baccai M, Fitzgerald M: Development of pain pathways and mechanisms, Wall and Melzack's Textbook of Pain, 5th edition. Edited by McMahon SB, Koltzenburg M. New York, Churchill Livingstone, 2006, pp 143-74
- Ren K, Novikova SI, He F, Dubner R, Lidow MS: Neonatal local noxious insult affects gene expression in the spinal dorsal horn of adult rats. *Mol Pain* 2005; 1:27
- Kehlet H, Holte K: Effect of postoperative analgesia on surgical outcome. *Br J Anaesth* 2001; 87:62-72
- Gottschalk A, Ochroch EA: Preemptive analgesia: What do we do now? *ANESTHESIOLOGY* 2003; 98:280-1
- Kissin I: Preemptive analgesia. *ANESTHESIOLOGY* 2000; 93:1138-43
- Brennan TJ, Zahn PK, Pogatzki-Zahn EM: Mechanisms of incisional pain. *Anesthesiol Clin North Am* 2005; 23:1-20
- Zahn PK, Brennan TJ: Lack of effect of intrathecally administered N-methyl-D-aspartate receptor antagonists in a rat model for postoperative pain. *ANESTHESIOLOGY* 1998; 88:143-56
- Liaw WJ, Stephens RL Jr, Binns BC, Chu Y, Sepkuty JP, Johns RA, Rothstein JD, Tao YX: Spinal glutamate uptake is critical for maintaining normal sensory transmission in rat spinal cord. *Pain* 2005; 115:60-70
- Chaplan SR, Bach FW, Pogrel JW, Chung JM, Yaksh TL: Quantitative assessment of tactile allodynia in the rat paw. *J Neurosci Methods* 1994; 53:55-63
- Dixon WJ: Efficient analysis of experimental observations. *Annu Rev Pharmacol Toxicol* 1980; 20:441-62
- Brennan TJ, Vandermeulen EP, Gebhart GF: Characterization of a rat model of incisional pain. *Pain* 1996; 64:493-501
- Pogatzki EM, Niemeier JS, Sorkin LS, Brennan TJ: Spinal glutamate receptor antagonists differentiate primary and secondary mechanical hyperalgesia caused by incision. *Pain* 2003; 105:97-107
- Yaksh TL, Rudy TA: Chronic catheterization of the spinal subarachnoid space. *Physiol Behav* 1976; 17:1031-6
- Zhang B, Tao F, Liaw WJ, Bredt DS, Johns RA, Tao YX: Effect of knock down of spinal cord PSD-93/chapsin-110 on persistent pain induced by complete Freund's adjuvant and peripheral nerve injury. *Pain* 2003; 106:187-96
- Tao YX, Hassan A, Haddad E, Johns RA: Expression and action of cyclic GMP-dependent protein kinase I $\alpha$  in inflammatory hyperalgesia in rat spinal cord. *Neuroscience* 2000; 95:525-33
- Tao YX, Johns RA: Activation and up-regulation of spinal cord nitric oxide receptor, soluble guanylate cyclase, after formalin injection into the rat hind paw. *Neuroscience* 2002; 112:439-46
- Celerier E, Rivat C, Jun Y, Laulin JP, Larcher A, Reynier P, Simonnet G: Long-lasting hyperalgesia induced by fentanyl in rats: Preventive effect of ketamine. *ANESTHESIOLOGY* 2000; 92:465-72
- Bullitt E: Expression of c-fos-like protein as a marker for neuronal activity following noxious stimulation in the rat. *J Comp Neurol* 1990; 296:517-30
- Tao YX, Zhao ZQ: NMDA receptors mediating Fos expression in rat spinal cord induced by subcutaneous injection of formalin. *Acta Pharmacol Sin* 1998; 19:506-9
- Chapman V, Buritova J, Honore P, Besson JM: Physiological contributions of neurokinin 1 receptor activation, and interactions with NMDA receptors, to inflammatory-evoked spinal c-Fos expression. *J Neurophysiol* 1996; 76:1817-27
- Rahman OI, Terayama R, Ikeda T, Koganemaru M, Nakamura T, Shiba R, Nishimori T: Differential effects of NMDA and AMPA/KA receptor antagonists on c-Fos or Zif/268 expression in the rat spinal dorsal horn induced by noxious thermal or mechanical stimulation, or formalin injection. *Neurosci Res* 2002; 43:389-99
- Chapman V, Buritova J, Honore P, Besson JM: 7-Nitro-indazole, a selective inhibitor of neuronal nitric oxide synthase, reduces formalin evoked c-Fos expression in dorsal horn neurons of the rat spinal cord. *Brain Res* 1995; 697:258-61
- Wang G, Ji Y, Lidow MS, Traub RJ: Neonatal hindpaw injury alters processing of visceral and somatic nociceptive stimuli in the adult rat. *J Pain* 2004; 5:440-9
- Anseloni VC, He F, Novikova SI, Turnbach Robbins M, Lidow IA, Ennis M, Lidow MS: Alterations in stress-associated behaviors and neurochemical markers in adult rats after neonatal short-lasting local inflammatory insult. *Neuroscience* 2005; 131:635-45
- Field HL, Basbaum AI, Heinricher MM: Central nervous system mechanisms of pain modulation, Wall and Melzack's Textbook of Pain, 5th edition. Edited by McMahon SB, Koltzenburg M. New York, Churchill Livingstone, 2006, pp 125-42
- Keay KA, Bandler R: Parallel circuits mediating distinct emotional coping reactions to different types of stress. *Neurosci Biobehav Rev* 2001; 25:669-78
- Dinarello CA: The IL-1 family and inflammatory diseases. *Clin Exp Rheumatol* 2002; 20:S1-13
- Conti P, Kempuraj D, Frydas S, Kandere K, Boucher W, Letourneau R, Madhappan B, Sagimoto K, Christodoulou S, Theoharides TC: IL-10 subfamily members: IL-19, IL-20, IL-22, IL-24 and IL-26. *Immunol Lett* 2003; 88:171-4
- Dubner R, Ruda MA: Activity-dependent neuronal plasticity following tissue injury and inflammation. *Trends Neurosci* 1992; 15:96-103
- Millan MJ: Descending control of pain. *Prog Neurobiol* 2002; 66:355-474
- Moore KA, Baba H, Woolf CJ: Synaptic transmission and plasticity in the superficial dorsal horn. *Prog Brain Res* 2000; 129:63-80
- Dubner R, Basbaum AI: Spinal dorsal horn plasticity following tissue or nerve injury, The Textbook of Pain, 3rd edition. Edited by Wall PD, Melzack R. London, Churchill-Livingstone, 1994, pp 225-41
- Matsuda K, Fletcher M, Kamiya Y, Yuzaki M: Specific assembly with the NMDA receptor 3B subunit controls surface expression and calcium permeability of NMDA receptors. *J Neurosci* 2003; 23:10064-73
- Erreger K, Dravid SM, Banke TG, Wyllie DJ, Traynelis SF: Subunit-specific gating controls rat NR1/NR2A and NR1/NR2B NMDA channel kinetics and synaptic signalling profiles. *J Physiol* 2005; 563:345-58
- Marsh DF, Hatch DJ, Fitzgerald M: Opioid systems and the newborn. *Br J Anaesth* 1997; 79:787-95
